# Supplementary material for: Evolution toward beta common chain receptor usage links the matrix proteins of HIV-1 and its ancestors to human erythropoietin
Source: PubMed Central journal article supplement (PMC7812818; doi:10.1073/pnas.2021366118), 2020-12-28
Supplement: pnas.2021366118.sapp.pdf [file pnas.2021366118.sapp.pdf]

## **Supporting Information**

### **Materials and Methods**

#### **Recombinant proteins**

Purified endotoxin (lipopolysaccharide)-free recombinant monomeric p17 (from clone BH10 of clade B isolate), glutathione S-transferase (GST), and the HIV-1 capsid protein p24 (p24) were produced as previously described (9). The absence of endotoxin contamination ( $< 0.25$  endotoxin units/ml) in protein preparations was assessed by the Limulus amoebocyte assay (Associates of Cape Cod, Inc.). In some experiments we used aggregated p17 to stimulate ECs. Aggregation of p17 was achieved as previously described (25).

#### **Cell Cultures**

ECs were isolated and characterized as previously described (17) and cultured in endothelial growth medium (EGM) (Lonza, Milan, Italy) containing 10% (vol/vol) fetal bovine serum (FBS). Human aortic endothelial cells (HAECs) were purchased from Clonetics (San Diego, CA, USA) and in EGM-2MV (Lonza) containing 10% (vol/vol) (FBS). Human lung microvascular endothelial cells (HMVEC-Ls) were purchased from Clonetics (San Diego) and cultured in EGM-2MV (Lonza) containing 10% (FBS). Human primary lymph node-derived endothelial cells (LN-LECs) have been developed and characterized as previously described (23). Cells were cultured in endothelial growth medium (EGM) (Lonza) containing 10% and supplemented with VEGF-C (25 ng/mL) (Reliatech, Wolfenbuettel, Germany). All experiments were carried out with cells at passages 2-6.

#### **Silencing by siRNA technique**

Nucleoporation of HUVECs was performed using the Amaxa Nucleofector Technology (Lonza) following the manufacturer's protocol. Small interfering RNAs (siRNAs) were added to  $1 \times 10^6$  cells resuspended in 100  $\mu$ l of nucleofection buffer. Silencing was carried out using 300 nM of Beclin-1

siRNA (Cell Signaling Technology, Boston, MA) or 10  $\mu$ M CD131 siRNA (Santa Cruz Biotechnology). Irrelevant siRNAs (siScramble; Cell Signaling Technology) were used as a negative control.

### **In vitro tube-like structure formation assay**

ECs were grown under normal (10% FBS) or stressed (serum starved; 0.5% FBS) conditions for 16 h in endothelial basal medium (EBM) and then harvested and resuspended in EGM containing 10% FBS. Cells were seeded ( $5 \times 10^4$  per well) in wells coated with growth factor-reduced Cultrex basement membrane extract (BME; Trevigen Gaithersburg, MD) and left untreated or treated with 10 ng/ml of GST, p24, p17, Erythropoietin (EPO), CXCL-8 (R&D), different p17 derived peptides or EPO peptide. When indicated, cells were nucleofected with siRNAs specific for Beclin-1,  $\beta$ CR or with siScramble. In some experiments, ECs were pretreated for 16 h at 37°C with 5 mM 3-methyladenine (3-MA) (Sigma-Aldrich, St. Louis, MO). When reported starved ECs were pretreated with 2.5  $\mu$ g/ml of MAb to CXCR1 (MAb 330; R&D, Minneapolis, MN) and CXCR2 (MAb 331; R&D) alone or in combination (1.25  $\mu$ g/ml each) or with an isotype-matched MAb (2.5  $\mu$ g/ml; R&D) for 1 h at 37°C before p17 stimulation. Wells were then analyzed for the formation of tube structures.

### **Wound-healing assay**

ECs were plated on 24-well plates ( $1 \times 10^5$  cells per well) in EGM containing 10% FBS. Confluent monolayers were nutrient starved for 16 h in the presence or absence of 3-MA (5 mM) (Sigma-Aldrich) and then scratched using a 200  $\mu$ l pipette tip. After being washed, cells were left untreated or treated with 10 ng/ml of GST, p24, p17, Peptide F2 or Peptide F3.

### **Aortic Ring Assay**

The rat aortic ring assay was performed as previously described (17). Briefly, the dorsal aorta was excised from 6-wk-old Sprague-Dawley rats. Rings, 1-mm thick, were embedded in collagen gel and

then incubated with serum-free EBM containing peptide F2, peptide F3 (10 ng/ml), or p17 (20 ng/ml) (Thermo Fisher Scientific, Rodano, Italy). The plates were incubated for 10 days and angiogenesis was quantified by counting the number of microvessels originating from aortic rings.

### **Chick Chorioallantoic (CAM) Assay**

Fertilized White Leghorn chicken eggs (30 per group) were incubated at 37 °C at constant humidity. On day 3, a square window was opened in the shell, and 2-3 ml of albumin was removed to allow detachment of the developing CAM. The window was sealed with a glass, and the eggs were returned to the incubator. On day 8, eggs were treated with 1 mm<sup>3</sup> sterilized gelatin sponges (Gelfoam; Upjohn, Kalamazoo, Mich, MI) placed on top of the growing CAM, as previously described (17) and loaded with 1 µl of PBS (negative control), 1 µl of PBS containing 200 ng of p17, 50 ng of peptide F2 or peptide F3. CAMs were examined daily until day 12 and photographed in ovo with a stereomicroscope equipped with a camera and image analyzer system (Olympus). At day 12, the angiogenic response was evaluated by the image analyzer system and counted as the number of vessels converging toward the sponge.

### **Western blotting**

Human umbilical vein endothelial cells (HUVECs) lysates were loaded for electrophoresis on a 10% polyacrylamide gel, and transferred onto PVDF membranes. Membranes were then blocked and probed overnight at 4° C with primary mouse anti-CD131 (1C1, 1:200; Santa Cruz Biotechnology, Dallas, Texas, USA) and mouse anti-β-Actin (C4) (Santa Cruz Biotechnologies) antibodies. Membranes were washed and incubated with anti-mouse peroxidase-conjugated secondary antibody (1:3000; Cell Signaling Technology, Danvers, MA, USA). Antibody detection was accomplished with the ECL system (Euroclone S.p.a., Milan, Italy), and protein bands were quantified with the ImageJ analysis system. Band densities were represented as an index of CD131 corrected by β-Actin.

## **SPR Binding Assay**

SPR measurements were performed on a BIAcore X100 instrument (GE Healthcare, Chicago, Illinois, USA). For the study of Erythropoietin receptor (EPO-R) interactions, homodimeric recombinant EPOR (Recombinant human EPOR protein Fc chimera) was captured onto a CM5 sensorchip containing pre-immobilized protein A (Merck KGaA, Darmstadt, Germany), allowing the immobilization of 3500 resonance units (RU), equal to 63 fmol/mm<sup>2</sup> of EPOR. A sensorchip precoated with protein A alone was used to evaluate nonspecific binding and for blank subtraction. EPO, monomeric or oligomeric p17 (300 nM) in 10 mM HEPES, pH 7.4 containing 150 mM NaCl, 3 mM EDTA, and 0.05% surfactant P20 (HBS-EP<sup>+</sup>) were injected over EPOR (Abcam, Cambridge, UK), or protein A surfaces for 4 min and then washed until dissociation. After each run, the sensorchip was regenerated by injection of 2.0 mM NaCl in HBS-EP<sup>+</sup>. For the study of  $\beta$ CR interactions, anti-His antibody (anti His-Tag Rabbit Polyclonal Antibody, Origene, Rockville, MD, USA) was immobilized onto a CM5 sensorchip using standard amine-coupling chemistry as previously described (20). Then, recombinant homodimeric  $\beta$ CR with a C-terminal 6-His tag (50  $\mu$ g/ml) (Recombinant Human Common  $\beta$  Chain His Tagged (CD131/ $\beta$ CR) (R&D Systems, Minneapolis, USA) was injected over the anti-His surface, allowing the immobilization of 156 RU, equal to 1,2 fmol/mm<sup>2</sup> of the receptor. A sensorchip coated with anti-His antibody was used as a negative control and for blank subtraction. EPO, monomeric or oligomeric p17 (300 nM) in HBS-EP<sup>+</sup> were injected over  $\beta$ CR or anti-His surfaces for 4 min and then washed until dissociation. After each run, the sensorchip was regenerated by injection of 2.0 mM NaCl in HBS-EP<sup>+</sup>.

## **Data collection, alignment and phylogenetic analysis**

Several steps were involved in the bioinformatics study:

- 1) A dataset of 33220 sequences of p17 was retrieved from Uniprot.

- 2) A unique alignment has been generated using Clustal Omega and Muscle and manually curated discarding sequences with missing, unknown (X) or uncertain (B and Z) residues.
- 3) The remaining 33180 sequences were clustered based on variability of spanning residues 37-52, in 608 clusters. Over 33180 sequences, 32753 are HIV-1, 39 are HIV-2 and 388 are SIVs: 31 SIVcpz, 9 SIVgor, 239 SIVsmm and 109 old world monkey (OWM) SIV. The dataset includes a considerable proportion of HIV-1 sequences in order to identify all mutational events that occurred during 37-52 p17 fragment phylogeny.
- 4) The 37-52 p17 fragment sequences of the 608 clusters were aligned using the software Muscle.
- 5) For each of the three selected fragments we have performed the following procedure:

Trees 37-52 p17 fragment, S1 and S2 were obtained using the sequences of fragments 37-52, 37-44 and 45-49 respectively. Trees have been generated using the neighbour-joining (NJ) and a maximum likelihood (ML) methods. For the NJ analysis we used Clustal W with default setting and bootstrap of 1000; for ML we used PhyML program (v.3.0) with the generalised time reversible substitution model and subtree pruning and regrafting branch swapping and Raxml with similar settings. Bootstrap support values were calculated using > 1,000 pseudo-replicate trees. The best-fitting model of nucleotide substitution was determined using MEGA (v.5). The structural study of the fragments (37-52 p17, S1 and S2) was obtained using the structures of the p17 protein of HIV-1 (pdb code: 2HMX, 1UPH, 1L6N, 1TAM and 1HIW) and HIV-2 (pdb code: 2K4H and 2k4E) using the align command of Pymol.

### **Statistical analysis**

Data obtained from multiple independent experiments are expressed as the means  $\pm$  the standard deviation (SD). The data were analyzed for statistical significance using t-test or one-way analysis of

variance (ANOVA). Bonferroni's post-test was used to compare data. Differences were considered significant at a P value of  $<0.05$ . Statistical tests were performed using Prism 8 software (GraphPad).

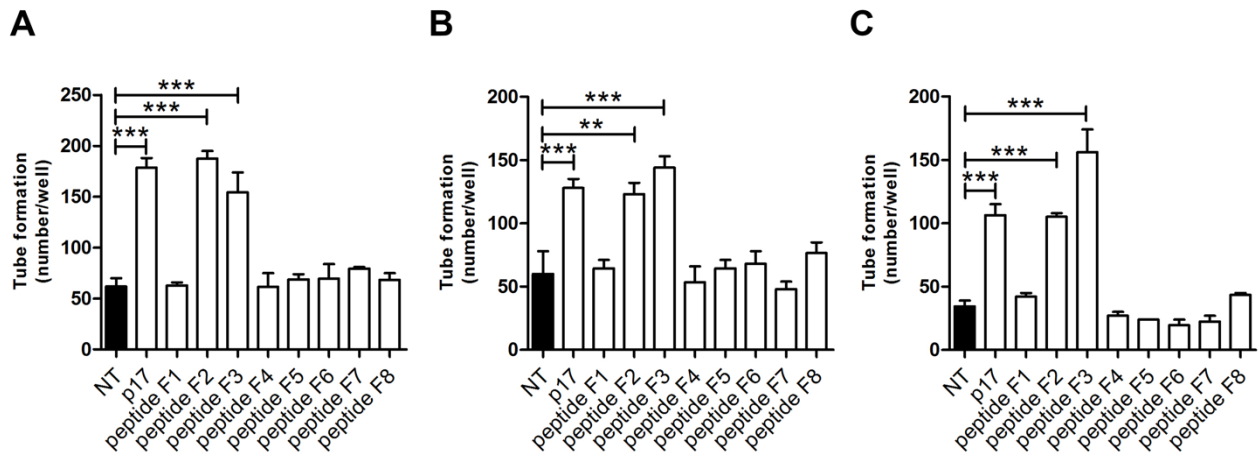

**Figure S1. Peptides F2 and F3 induce angiogenesis in human ECs derived from different organs.**

Human aortic endothelial cells (HAECs) (A), Human lung microvascular endothelial cells (HMVEC-Ls) (B) and Human primary lymph node-derived endothelial cells (LN-LECs) (C) were cultured under stressed condition (EBM containing 0.5% FBS) for 16 h at 37°C and then stimulated for 8 h at 37°C with 10 ng/ml of p17 or each p17-derived peptide (F1, F2, F3, F4, F5, F6, F7, F8). NT, not treated. Values reported for tube formation are the mean  $\pm$  SD of one representative experiment, out of three with similar results, performed in triplicate. Statistical analysis was performed by one-way ANOVA, and the Bonferroni post-test was used to compare data (\*\*P<0.01; \*\*\*P<0.001).

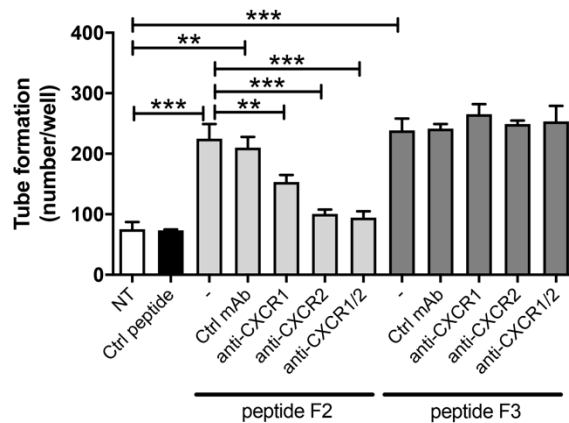

**Figure S2. Peptide F2 – but not F3 – induced tube-like structure formation occurs through CXCR1 and CXCR2.** HUVECs were cultured under stressed condition (EBM containing 0.5% FBS) for 16 h at 37°C and then preincubated for 1 h at 37°C with 2.5 µg/ml of a control isotype-matched mAb (Ctrl mAb), a neutralizing mAb to CXCR1 and/or a neutralizing mAb to CXCR2 and then stimulated with 10 ng/ml of peptides F2 or F3 for 8 h at 37°C. Values reported for tube formation are the mean ± SD of one representative experiment, out of three with similar results, performed in triplicate. Statistical analysis was performed by one-way ANOVA, and the Bonferroni post-test was used to compare data (\*\*P<0.01, \*\*\*P<0.001). NT, not treated.



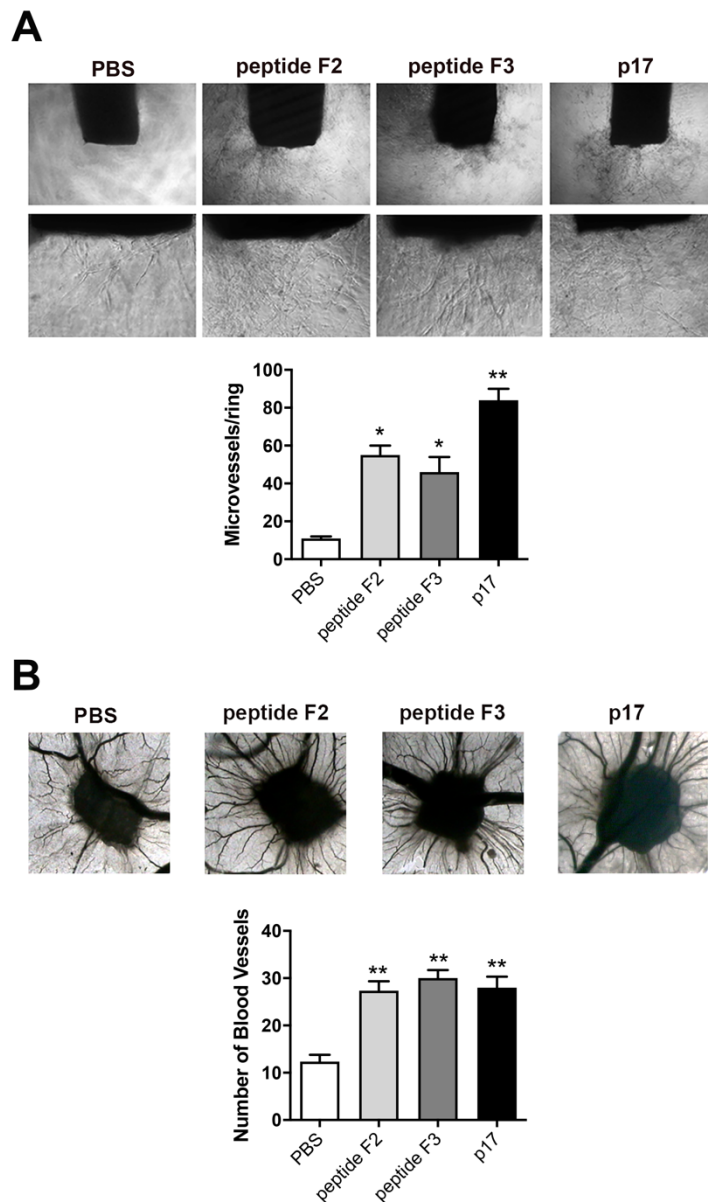

**Figure S3. Peptides F2 and F3 promote vasculogenesis in rat aortic ring and CAM assays.** (A) Rat aortic rings were embedded in collagen gel and incubated for 10 days in EBM containing 10 ng/ml of peptide F2 or F3. Control rings were incubated for 10 days in EBM in the presence of PBS or p17 (20 ng/ml). Microvessel structures were observed by phase microscopy on day 7. (B) Macroscopic pictures of CAMs at day 12 of incubation. Gelatin sponges were adsorbed with vehicle alone (PBS), with 200 ng of p17 or with 50 ng of peptide F2 or F3. Pictures are representative of three independent experiments with similar results. Original magnification,  $\times 4$ . Data are the mean  $\pm$  SD of three independent experiments. Statistical analysis was performed by one-way ANOVA, and the Bonferroni post-test was used to compare data (\* $P < 0.05$ ; \*\* $P < 0.01$ ).

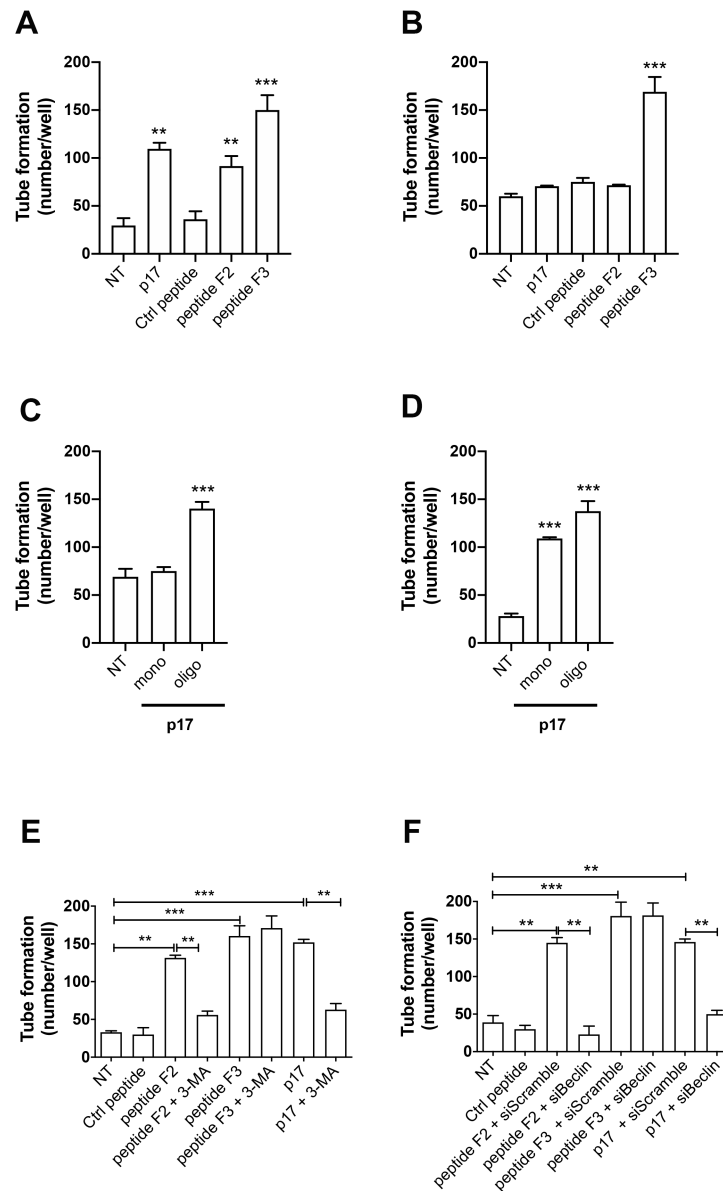

**Figure S4. Angiogenic activity of p17 and p17-derived peptides upon normal and stressed culture conditions.** (A) HUVECs were cultured under stressed condition (EBM containing 0.5% FBS) for 16 h at 37°C and then stimulated with 10 ng/ml of p17, peptide F2 or peptide F3 for 8 h at 37°C in complete medium. NT, not treated. (B) HUVECs were cultured under normal condition (EGM containing 10% FBS) and then stimulated with 10 ng/ml of p17, peptide F2 or peptide F3 for 8 h at 37°C. NT, not treated. (C) HUVECs were cultured under normal condition and then stimulated with 10 ng/ml of monomeric (mono) or oligomeric p17 (oligo) for 8 h at 37°C. NT, not treated. (D) HUVECs were cultured under stressed condition for 16 h at 37°C and then stimulated with 10 ng/ml of mono or oligo p17 for 8 h at 37°C in complete medium. NT, not treated. (E) HUVECs were

cultured under stressed condition for 16 h at 37°C in the presence or absence of 3-MA (5 mM) and then stimulated with 10 ng/ml of p17, peptide F2 or peptide F3 for 8 h at 37°C in complete medium. NT, not treated. (F) HUVECs were nucleofected with Beclin-1 siRNAs (siBeclin) or with irrelevant siRNAs (siScramble). Twenty-four h after nucleofection, cells were serum starved for 16 h and then stimulated with 10 ng/ml of p17, peptide F2 or peptide F3 for 8 h at 37°C in complete medium. NT, not treated. Values reported for tube formation are the mean  $\pm$  SD of one representative experiment, out of three with similar results, performed in triplicate. Statistical analysis was performed by one-way ANOVA and the Bonferroni post-test was used to compare data (\*\*P<0.01; \*\*\*P<0.001).

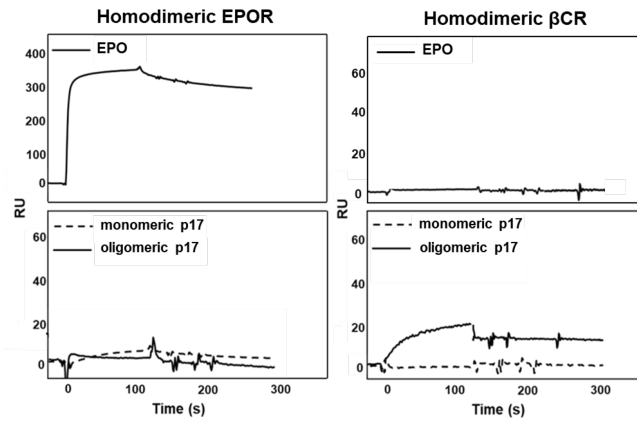

**Figure S5. SPR analysis of EPO and p17 binding to homodimeric EPOR and  $\beta$ CR.** The interaction between EPO, monomeric and oligomeric p17 with homodimeric EPOR or homodimeric  $\beta$ CR, were evaluated by SPR analysis. Sensorgrams report the binding of EPO (300 nM) and monomeric or oligomeric p17 (300 nM) to sensorchip coated with homodimeric EPOR (left panel) or  $\beta$ CR (right panel). The response was recorded in RU as a function of time.

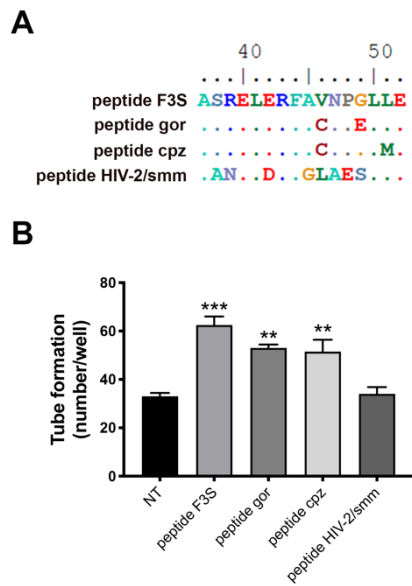

**Figure S6. Angiogenic activity of peptide F3-like SIV-derived peptides.** (A) Amino acid sequence of different peptides derived from the matrix protein of HIV-1 (peptide F3), SIVgor (peptide gor), SIVcpz (peptide cpz) or HIV-2/SIVsmm (peptide HIV-2/smm). (B) HUVECs were cultured under normal condition (EGM containing 10% FBS) and then stimulated with 10 ng/ml of peptides F3, gor, cpz or HIV-2/smm for 8 h at 37°C. NT, not treated. Values reported for tube formation are the mean  $\pm$  SD of one representative experiment, out of three with similar results, performed in triplicate. Statistical analysis was performed by one-way ANOVA and the Bonferroni post-test was used to compare data (\*\* $P < 0.01$ ; \*\*\* $P < 0.001$ ).

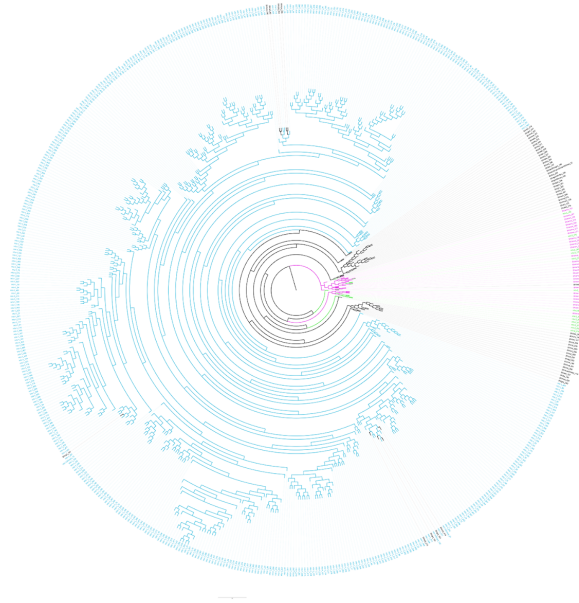

**Figure S7. Tree comparison for the 37-52 p17 fragments.** Phylogenetic tree of 37-52 p17 fragments constructed using the maximum likelihood (ML) method. The tree shows a comparable grouping for HIV-1, HIV-2 and SIVs. Viruses color code: HIV-1 azure, HIV-2 green, SIVsmm purple (and other SIVs in black).

A

|       |    |   |   |   |   |   |   |   |   |   |   |   |   |   |   |   |   |    |
|-------|----|---|---|---|---|---|---|---|---|---|---|---|---|---|---|---|---|----|
| EPO   | 8  | D | S | R | V | L | E | R | Y | - | - | - | - | - | L | L | E | 18 |
| HIV-1 | 37 | A | S | R | E | L | E | R | F | A | V | N | P | G | L | L | E | 52 |
| HIV-2 | 37 | A | A | N | E | L | D | R | F | G | L | A | E | S | L | L | E | 52 |

<-----s1----->X-----s2----->X-----s3----->

B

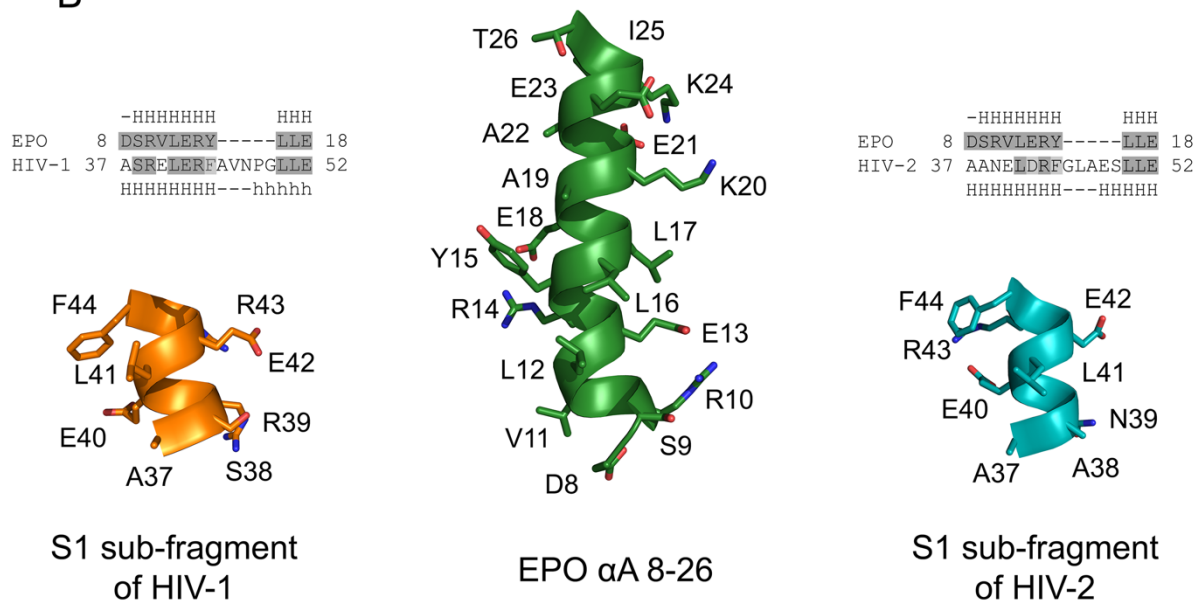

**Figure S8. Alignment and structural analysis of fragments.** (A) Alignment of 37-52 HIV-1 and 8-18 EPO fragments. Biochemical amino acid similarities between EPO and HIV-1 are shown in gray gradient. (B) Structural comparison between S1 of HIV-1 fragments, with  $\alpha$ A helix of EPO. In the alignment H correspond to  $\alpha$ -helix, while h to a  $\alpha$ -helix propensity. Biochemical amino acid similarities between EPO and HIV-1 are shown in gray gradient.

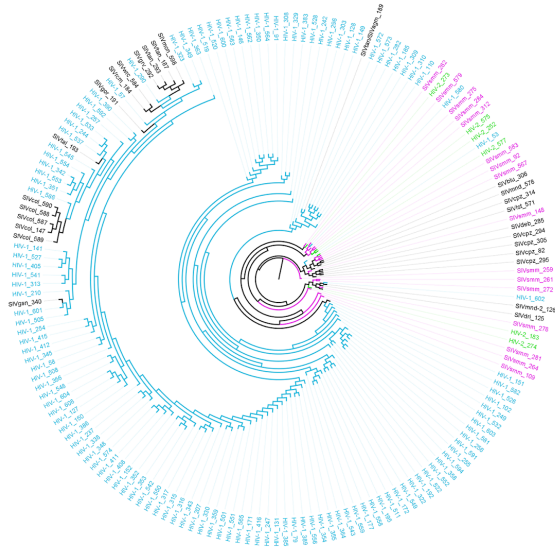

**Figure S9. S1 tree comparison.** Phylogenetic tree of S1 constructed using the maximum likelihood (ML) method. The tree shows a comparable grouping for HIV-1, HIV-2, SIVs. Viruses color code: HIV-1 azure, HIV-2 green, SIVsmm purple (and other SIVs in black).



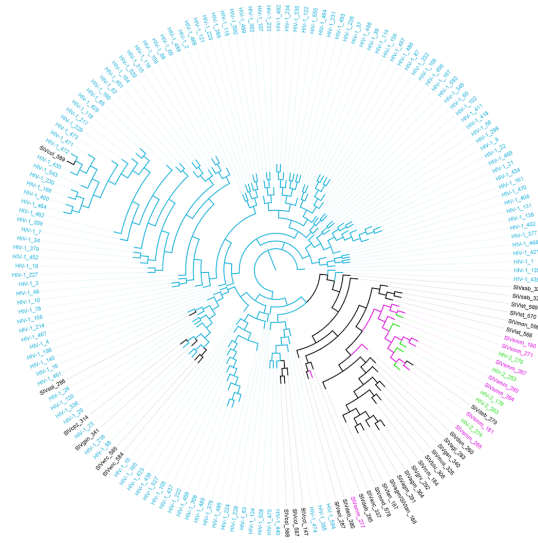

**Figure S10. S2 tree comparison.** Phylogenetic tree of S2 constructed using the maximum likelihood (ML) method. The tree shows a comparable grouping for HIV-1, HIV-2 and SIVs. Viruses color code: HIV-1 azure, HIV-2 green, SIVsmm purple (and other SIVs in black).

**Table S1. Clusters dataset of 37-52 p17 fragments.** The table shows the dataset used for phylogenetic analysis. For each cluster is shown: cluster number, aa fragment sequence, virus strain, number of sequences included in each cluster and percentage of sequence per cluster. In the table 37-52 fragments sequences belonging to each cluster are associated with a unique virus (HIV-1, HIV-2 or SIV) with accuracy close to 100%.

| Cluster number | 37-52 p17 fragment sequence | Virus strain             | Number of sequences for each cluster | %      |
|----------------|-----------------------------|--------------------------|--------------------------------------|--------|
| 1              | ASRELERFAVNPGLLE            | HIV-1                    | 13732                                | 41,386 |
| 2              | ASRELERFALNPGLLE            | HIV-1                    | 10949                                | 32,999 |
| 3              | ASRELERFALNPSLLE            | HIV-1                    | 2125                                 | 6,404  |
| 4              | ASRELERFAINPGLLE            | HIV-1                    | 988                                  | 2,978  |
| 5              | ASRELDRFALNPGLLE            | HIV-1                    | 456                                  | 1,374  |
| 6              | ASRELEKFALNPGLLE            | HIV-1                    | 399                                  | 1,203  |
| 7              | ASRELERFALNPDLLLE           | HIV-1                    | 371                                  | 1,118  |
| 8              | ASRELERFALDPGLLE            | HIV-1                    | 306                                  | 0,922  |
| 9              | ASRELDRFALNPSLLE            | HIV-1                    | 297                                  | 0,895  |
| 10             | ASRELERFAVNPSLLE            | HIV-1                    | 216                                  | 0,651  |
| 11             | ASRELERFAVNPSLME            | HIV-1                    | 197                                  | 0,594  |
| 12             | AANELDRFGLAESLLE            | HIV-2/SIV <sub>smm</sub> | 180                                  | 0,542  |
| 13             | ASRELEKFALNPDLLLE           | HIV-1                    | 116                                  | 0,35   |
| 14             | ASRELDRFAVNPGLLE            | HIV-1                    | 92                                   | 0,277  |
| 15             | ASRELERFAVNNSGLLE           | HIV-1                    | 92                                   | 0,277  |
| 16             | ASRELERFALNSGLLE            | HIV-1                    | 83                                   | 0,25   |
| 17             | ASRELDRFAINPGLLE            | HIV-1                    | 77                                   | 0,232  |
| 18             | ASRELERFAVNPGLLD            | HIV-1                    | 60                                   | 0,181  |
| 19             | ASRELERFALNPNLLE            | HIV-1                    | 57                                   | 0,172  |

|    |                   |                                     |    |       |
|----|-------------------|-------------------------------------|----|-------|
| 20 | ASRELERFALNSSLLE  | HIV-1                               | 56 | 0,169 |
| 21 | ASRELERFALDPSLLE  | HIV-1                               | 54 | 0,163 |
| 22 | ASRELERFAVDPGLLE  | HIV-1                               | 52 | 0,157 |
| 23 | ASRELERFALSSGLLE  | HIV-1                               | 48 | 0,145 |
| 24 | ASREMERFALNPSLLE  | HIV-1                               | 48 | 0,145 |
| 25 | ASRELERYALNPGLLE  | HIV-1                               | 46 | 0,139 |
| 26 | AGRELERFALNPGLLE  | HIV-1                               | 45 | 0,136 |
| 27 | ASKELERFALNPGLLE  | HIV-1                               | 41 | 0,124 |
| 28 | ASRELERFALNSDLLE  | HIV-1                               | 41 | 0,124 |
| 29 | ASRELGRFALNPGLLE  | HIV-1                               | 41 | 0,124 |
| 30 | ASRELEKFALNPSLLE  | HIV-1                               | 39 | 0,118 |
| 31 | ASRELERFALNPGLLD  | HIV-1                               | 37 | 0,112 |
| 32 | AGKEMERFGLHEKLLE  | SIVver/SIVg<br>rv/SIVtan/SI<br>Vmal | 36 | 0,108 |
| 33 | ASKELERFAVNPGLLE  | HIV-1                               | 36 | 0,108 |
| 34 | ASRELERFALNPELLE  | HIV-1                               | 36 | 0,108 |
| 35 | ASREMERFALNPGLLE  | HIV-1                               | 34 | 0,102 |
| 36 | VSRELERFAVNPGLLE  | HIV-1                               | 34 | 0,102 |
| 37 | ASRELERFSLNPGLLE  | HIV-1                               | 32 | 0,096 |
| 38 | AANELDRFGLAESLLD  | SIVsmm                              | 30 | 0,09  |
| 39 | ASRELERFSINPGLLE  | HIV-1                               | 29 | 0,087 |
| 40 | AGRELERFAVNPGLLE  | HIV-1                               | 25 | 0,075 |
| 41 | ASRELERFAVNPGLME  | HIV-1                               | 25 | 0,075 |
| 42 | AGRELERFALNPSLLE  | HIV-1                               | 23 | 0,069 |
| 43 | ASRELDRLFALNPDLLD | HIV-1                               | 23 | 0,069 |
| 44 | ASRELEKFAINPGLLE  | HIV-1                               | 20 | 0,06  |
| 45 | ASRELERFALNPGFLE  | HIV-1                               | 20 | 0,06  |
| 46 | ASRELERFAVNPGLIE  | HIV-1                               | 20 | 0,06  |

|    |                   |              |    |       |
|----|-------------------|--------------|----|-------|
| 47 | ASRELERYAVNPGLLE  | HIV-1        | 20 | 0,06  |
| 48 | ASRELERFAINPSLLE  | HIV-1        | 18 | 0,054 |
| 49 | ASRELERFALNPGLME  | HIV-1        | 18 | 0,054 |
| 50 | ASRELDRLFALNSGLLE | HIV-1        | 17 | 0,051 |
| 51 | ASRELGRFALNSGLLE  | HIV-1        | 17 | 0,051 |
| 52 | ASREVERFALNPGLLE  | HIV-1        | 17 | 0,051 |
| 53 | ASNELERFALNPGLLE  | HIV-1        | 15 | 0,045 |
| 54 | ASRELEKFSLNPGLE   | HIV-1        | 15 | 0,045 |
| 55 | ASRELENFALNPGLLE  | HIV-1        | 15 | 0,045 |
| 56 | ASRELERFAIDPGLLE  | HIV-1        | 15 | 0,045 |
| 57 | ASKELEKFALNPGLLE  | HIV-1        | 14 | 0,042 |
| 58 | ASQELERFALNPGLLE  | HIV-1        | 14 | 0,042 |
| 59 | ASRELDRLFALNPGLLD | HIV-1        | 14 | 0,042 |
| 60 | ASRELERFACNPGLLE  | HIV-1        | 14 | 0,042 |
| 61 | ASRELERFALNPGPLE  | HIV-1        | 14 | 0,042 |
| 62 | ASRELERFAVNPDLLE  | HIV-1        | 14 | 0,042 |
| 63 | ASRELERFAVNAGLLE  | HIV-1        | 13 | 0,039 |
| 64 | ASRQLERFALNPSLLE  | HIV-1        | 13 | 0,039 |
| 65 | ASRELEKFSINPGLLE  | HIV-1        | 12 | 0,036 |
| 66 | ASRELEQFAINPGLLE  | HIV-1        | 11 | 0,033 |
| 67 | ASRELERFACNPGLME  | HIV-1/SIVcpz | 11 | 0,033 |
| 68 | ASRELERFALDSGLLE  | HIV-1        | 11 | 0,033 |
| 69 | ASRELERFALNPALLE  | HIV-1        | 11 | 0,033 |
| 70 | ASREMEKFALNSDLLE  | HIV-1        | 11 | 0,033 |
| 71 | ASGELERFAVNPGLLE  | HIV-1        | 10 | 0,03  |
| 72 | ASKELERFAINPGLLE  | HIV-1        | 10 | 0,03  |
| 73 | ASRELERFACNPGLMD  | HIV-1/SIVcpz | 10 | 0,03  |

|     |                  |                                            |    |       |
|-----|------------------|--------------------------------------------|----|-------|
| 74  | ASRELGRFAVNPGLLE | HIV-1                                      | 10 | 0,03  |
| 75  | ASREMERFALNSDLLE | HIV-1                                      | 10 | 0,03  |
| 76  | ASRELDRFALDPGLLE | HIV-1                                      | 9  | 0,027 |
| 77  | ASRELEQFAVNPGLLE | HIV-1                                      | 9  | 0,027 |
| 78  | ASRELERFAVNPALLE | HIV-1                                      | 9  | 0,027 |
| 79  | ASRELERVALNPSLLE | HIV-1                                      | 9  | 0,027 |
| 80  | ASREVERFALNPELLE | HIV-1                                      | 9  | 0,027 |
| 81  | AANELDRFGLADSLLE | SIV <sub>smm</sub>                         | 8  | 0,024 |
| 82  | AGSELQRFAMNPGLME | SIV <sub>cpz</sub>                         | 8  | 0,024 |
| 83  | ASGELERFALNPGLLE | HIV-1                                      | 8  | 0,024 |
| 84  | ASRELEGFALNPGLLE | HIV-1                                      | 8  | 0,024 |
| 85  | ASRELERFALDPDLLE | HIV-1                                      | 8  | 0,024 |
| 86  | ASRELERFAVNPCLLE | HIV-1                                      | 8  | 0,024 |
| 87  | ASRELERFSINPSLLE | HIV-1                                      | 8  | 0,024 |
| 88  | ASRELGRFALNPSLLE | HIV-1                                      | 8  | 0,024 |
| 89  | ASRELSRFALNPSLLE | HIV-1                                      | 8  | 0,024 |
| 90  | ASREMEKFSLNPGLLE | HIV-1                                      | 8  | 0,024 |
| 91  | ASRGLERFALNPGLLE | HIV-1                                      | 8  | 0,024 |
| 92  | ATNELDRFGLAESLLE | SIV <sub>smm</sub>                         | 8  | 0,024 |
| 93  | ASRELERFALNPGLLG | HIV-1                                      | 7  | 0,021 |
| 94  | ASRELERFALNPSPLE | HIV-1                                      | 7  | 0,021 |
| 95  | ASRELERFAVNPGLLK | HIV-1                                      | 7  | 0,021 |
| 96  | ASRELERFAVNPGPPE | HIV-1                                      | 7  | 0,021 |
| 97  | ASRELERLAVNPGLLE | HIV-1                                      | 7  | 0,021 |
| 98  | ASRELERYALNPSLLE | HIV-1                                      | 7  | 0,021 |
| 99  | ASRGLERFAVNPGLLE | HIV-1                                      | 7  | 0,021 |
| 100 | AGKEMERFGLHERLLE | SIV <sub>grv</sub> /SIV <sub>v</sub><br>er | 6  | 0,018 |
| 101 | ASRELDKFALNPGLLE | HIV-1                                      | 6  | 0,018 |

|     |                   |                   |   |       |
|-----|-------------------|-------------------|---|-------|
| 102 | ASRELDRFACNPELLE  | HIV-1             | 6 | 0,018 |
| 103 | ASRELEQFALNPGLLE  | HIV-1             | 6 | 0,018 |
| 104 | ASRELERFACNPELME  | SIVgor            | 6 | 0,018 |
| 105 | ASRELERFALNHSLLE  | HIV-1             | 6 | 0,018 |
| 106 | ASRELERFSVNPGLLE  | HIV-1             | 6 | 0,018 |
| 107 | ASRELERFTLNPGLLE  | HIV-1             | 6 | 0,018 |
| 108 | ASRELNRFALNPSLLE  | HIV-1             | 6 | 0,018 |
| 109 | AARELDRFGLAESLLE  | SIVsmm            | 5 | 0,015 |
| 110 | AGRELERFAINPGLLE  | HIV-1             | 5 | 0,015 |
| 111 | AGRELERFALNPDLLLE | HIV-1             | 5 | 0,015 |
| 112 | ASKELERFALNPSLLE  | HIV-1             | 5 | 0,015 |
| 113 | ASKELERFGLSDSLLE  | SIVmus/SIV<br>asc | 5 | 0,015 |
| 114 | ASRELEKFSINPDLLA  | HIV-1             | 5 | 0,015 |
| 115 | ASRELERFALHPGLLE  | HIV-1             | 5 | 0,015 |
| 116 | ASRELERFALNPCLLE  | HIV-1             | 5 | 0,015 |
| 117 | ASRELERFALNPGLLK  | HIV-1             | 5 | 0,015 |
| 118 | ASRELERFALSPGLLE  | HIV-1             | 5 | 0,015 |
| 119 | ASRELERFAVNPGLLG  | HIV-1             | 5 | 0,015 |
| 120 | ASRELERFAVNSSLLE  | HIV-1             | 5 | 0,015 |
| 121 | ASRELERFAVYPGLLE  | HIV-1             | 5 | 0,015 |
| 122 | ASRELERFVLNPGLLE  | HIV-1             | 5 | 0,015 |
| 123 | ASRELERLSINPGLLE  | HIV-1             | 5 | 0,015 |
| 124 | TSRELERFAVNPGLLE  | HIV-1             | 5 | 0,015 |
| 125 | VAKELDRFGLHERLLE  | SIVdrl            | 5 | 0,015 |
| 126 | VSKELDRFGLHEKLLE  | SIVmnd-2          | 5 | 0,015 |
| 127 | VSRELERYAVNPGLLE  | HIV-1             | 5 | 0,015 |
| 128 | AGRELEKFALNPGLLE  | HIV-1             | 4 | 0,012 |
| 129 | ASRELDRFALNSDLLE  | HIV-1             | 4 | 0,012 |

|     |                  |              |   |       |
|-----|------------------|--------------|---|-------|
| 130 | ASRELEGFALNPSLLE | HIV-1        | 4 | 0,012 |
| 131 | ASRELERFAANPGLLE | HIV-1        | 4 | 0,012 |
| 132 | ASRELERFACNPELLE | HIV-1/SIVgor | 4 | 0,012 |
| 133 | ASRELERFAINPSFLE | HIV-1        | 4 | 0,012 |
| 134 | ASRELERFALNAGLLE | HIV-1        | 4 | 0,012 |
| 135 | ASRELERFALNASLLE | HIV-1        | 4 | 0,012 |
| 136 | ASRELERFALNPEFLE | HIV-1        | 4 | 0,012 |
| 137 | ASRELERFALNPSLLD | HIV-1        | 4 | 0,012 |
| 138 | ASRELERFAPNPGLLE | HIV-1        | 4 | 0,012 |
| 139 | ASRELERFAVNPGFLE | HIV-1        | 4 | 0,012 |
| 140 | ASRELERFSLNSGLLE | HIV-1        | 4 | 0,012 |
| 141 | ASRELERSALNPGLLE | HIV-1        | 4 | 0,012 |
| 142 | ASRELERYAINPGLLE | HIV-1        | 4 | 0,012 |
| 143 | ASRELERYSLNPGLLE | HIV-1        | 4 | 0,012 |
| 144 | ASRELKRFALNPGLLE | HIV-1        | 4 | 0,012 |
| 145 | ASREPERFALNPGLLE | HIV-1        | 4 | 0,012 |
| 146 | ASRQLERFALNPGLLE | HIV-1        | 4 | 0,012 |
| 147 | MCTEVERLQLNIELLK | SIVcol       | 4 | 0,012 |
| 148 | AANELDRYGLAESLLE | SIVsmm       | 3 | 0,009 |
| 149 | AGRELERYAVNPGLLE | HIV-1        | 3 | 0,009 |
| 150 | AQQELERFAVNPGLLE | HIV-1        | 3 | 0,009 |
| 151 | ARRELERFAVNPGLLE | HIV-1        | 3 | 0,009 |
| 152 | ASKELENFALNPGLLE | HIV-1        | 3 | 0,009 |
| 153 | ASRELDRFSLNPGLLE | HIV-1        | 3 | 0,009 |
| 154 | ASRELEGFAVNPGLLE | HIV-1        | 3 | 0,009 |
| 155 | ASRELEKFSINPSLLE | HIV-1        | 3 | 0,009 |
| 156 | ASRELEKFSLNPDLE  | HIV-1        | 3 | 0,009 |
| 157 | ASRELEQFAVNSGLLK | HIV-1        | 3 | 0,009 |

|     |                   |                    |   |       |
|-----|-------------------|--------------------|---|-------|
| 158 | ASRELERFAFNPSLLE  | HIV-1              | 3 | 0,009 |
| 159 | ASRELERFAINPCLLE  | HIV-1              | 3 | 0,009 |
| 160 | ASRELERFAINPDLLLE | HIV-1              | 3 | 0,009 |
| 161 | ASRELERFALEPSLLE  | HIV-1              | 3 | 0,009 |
| 162 | ASRELERFALNPGVLE  | HIV-1              | 3 | 0,009 |
| 163 | ASRELERFALNPSLME  | HIV-1              | 3 | 0,009 |
| 164 | ASRELERFALNPVLLLE | HIV-1              | 3 | 0,009 |
| 165 | ASRELERFAVNHGLLE  | HIV-1              | 3 | 0,009 |
| 166 | ASRELERFAVNPGLSE  | HIV-1              | 3 | 0,009 |
| 167 | ASRELERFPLNPGLLE  | HIV-1              | 3 | 0,009 |
| 168 | ASRELERFSVTPGLLE  | HIV-1              | 3 | 0,009 |
| 169 | ASRELERSALNPSLLE  | HIV-1              | 3 | 0,009 |
| 170 | ASRELERSAVNPGLLE  | HIV-1              | 3 | 0,009 |
| 171 | ASRELETFALNPGLLE  | HIV-1              | 3 | 0,009 |
| 172 | ASRELGRFAINPGLLE  | HIV-1              | 3 | 0,009 |
| 173 | ASREMERFALNSGLLE  | HIV-1              | 3 | 0,009 |
| 174 | ASREPERFALNPSLLE  | HIV-1              | 3 | 0,009 |
| 175 | ASREVERFAVNPGLLE  | HIV-1              | 3 | 0,009 |
| 176 | ASRGLERFALNPSLLE  | HIV-1              | 3 | 0,009 |
| 177 | ASRKLDRFALNPALLE  | HIV-1              | 3 | 0,009 |
| 178 | TSRELERFALNPGLLE  | HIV-1              | 3 | 0,009 |
| 179 | AANELDKFGLAESLLE  | HIV-2              | 2 | 0,006 |
| 180 | AANELDRFGLAENLLE  | SIV <sub>smm</sub> | 2 | 0,006 |
| 181 | AANELDRFGLSEGLLE  | SIV <sub>smm</sub> | 2 | 0,006 |
| 182 | AANELDRFGLTESLLE  | HIV-2              | 2 | 0,006 |
| 183 | AANKLDRFGLAESLLE  | HIV-2              | 2 | 0,006 |
| 184 | ACKKLNKFGLSDHLLE  | SIV <sub>rcm</sub> | 2 | 0,006 |
| 185 | ACRELERFAVNPGLLE  | HIV-1              | 2 | 0,006 |
| 186 | ACRELERFGLSDTLLE  | SIV <sub>rcm</sub> | 2 | 0,006 |



|     |                   |               |   |       |
|-----|-------------------|---------------|---|-------|
| 187 | AGKEMERFGLHDKLLE  | SIVtan        | 2 | 0,006 |
| 188 | AGKEMERFGLHDRLLE  | SIVagm/SIVtan | 2 | 0,006 |
| 189 | AGREMERFGLHEKLLE  | SIVtan/SIVagm | 2 | 0,006 |
| 190 | ANRELERFALNPGLLE  | HIV-1         | 2 | 0,006 |
| 191 | ASKELERFACNPELME  | SIVgor        | 2 | 0,006 |
| 192 | ASKELGRFALNPGLLE  | HIV-1         | 2 | 0,006 |
| 193 | ASKEMERFGLSDALLE  | SIVtal        | 2 | 0,006 |
| 194 | ASMELERFALNPSLLE  | HIV-1         | 2 | 0,006 |
| 195 | ASRDLERFALNPSLLE  | HIV-1         | 2 | 0,006 |
| 196 | ASRELARFALNPGLLE  | HIV-1         | 2 | 0,006 |
| 197 | ASRELDRFACNPGLME  | SIVcpz        | 2 | 0,006 |
| 198 | ASRELDRFAINSGLLE  | HIV-1         | 2 | 0,006 |
| 199 | ASRELDRFALNPELLE  | HIV-1         | 2 | 0,006 |
| 200 | ASRELDRFALNPGFLE  | HIV-1         | 2 | 0,006 |
| 201 | ASRELDRFALNPGLLK  | HIV-1         | 2 | 0,006 |
| 202 | ASRELDRFALNPGLME  | HIV-1         | 2 | 0,006 |
| 203 | ASRELDRFALNPNLLE  | HIV-1         | 2 | 0,006 |
| 204 | ASRELDRFVNPGLME   | HIV-1         | 2 | 0,006 |
| 205 | ASRELDRYALNPDLLLE | HIV-1         | 2 | 0,006 |
| 206 | ASRELEGFALNSSLLE  | HIV-1         | 2 | 0,006 |
| 207 | ASRELEHFAINPGLLE  | HIV-1         | 2 | 0,006 |
| 208 | ASRELEKFALNPGLLK  | HIV-1         | 2 | 0,006 |
| 209 | ASRELEKFAVNPGLLE  | HIV-1         | 2 | 0,006 |
| 210 | ASRELEKYSINPGLLE  | HIV-1         | 2 | 0,006 |
| 211 | ASRELENFALNPSLLE  | HIV-1         | 2 | 0,006 |
| 212 | ASRELENFALNSGLLE  | HIV-1         | 2 | 0,006 |
| 213 | ASRELERFACDPGLME  | SIVcpz        | 2 | 0,006 |

|     |                   |       |   |       |
|-----|-------------------|-------|---|-------|
| 214 | ASRELERFAFNPGLLE  | HIV-1 | 2 | 0,006 |
| 215 | ASRELERFAINPGLLK  | HIV-1 | 2 | 0,006 |
| 216 | ASRELERFAINSGLLE  | HIV-1 | 2 | 0,006 |
| 217 | ASRELERFAISPGLLE  | HIV-1 | 2 | 0,006 |
| 218 | ASRELERFALDSSLLE  | HIV-1 | 2 | 0,006 |
| 219 | ASRELERFALNPGLSE  | HIV-1 | 2 | 0,006 |
| 220 | ASRELERFALNPGLVE  | HIV-1 | 2 | 0,006 |
| 221 | ASRELERFALNPSFLE  | HIV-1 | 2 | 0,006 |
| 222 | ASRELERFALNRDLLE  | HIV-1 | 2 | 0,006 |
| 223 | ASRELERFAVHPGLLE  | HIV-1 | 2 | 0,006 |
| 224 | ASRELERFAVNNGLLE  | HIV-1 | 2 | 0,006 |
| 225 | ASRELERFAVNPGHLE  | HIV-1 | 2 | 0,006 |
| 226 | ASRELERFAVNPGLVE  | HIV-1 | 2 | 0,006 |
| 227 | ASRELERFAVNPNLLE  | HIV-1 | 2 | 0,006 |
| 228 | ASRELERFAVNTGLLE  | HIV-1 | 2 | 0,006 |
| 229 | ASRELERFAVSPGLLE  | HIV-1 | 2 | 0,006 |
| 230 | ASRELERFAVTPGLLE  | HIV-1 | 2 | 0,006 |
| 231 | ASRELERFILNPGLLE  | HIV-1 | 2 | 0,006 |
| 232 | ASRELERFSLNPSLLE  | HIV-1 | 2 | 0,006 |
| 233 | ASRELERFTVNPGLLE  | HIV-1 | 2 | 0,006 |
| 234 | ASRELERFVINPSLLE  | HIV-1 | 2 | 0,006 |
| 235 | ASRELERFVLNPSLLE  | HIV-1 | 2 | 0,006 |
| 236 | ASRELERFVVNPGLLE  | HIV-1 | 2 | 0,006 |
| 237 | ASRELERLALNAGLLE  | HIV-1 | 2 | 0,006 |
| 238 | ASRELERLSLNPSLLE  | HIV-1 | 2 | 0,006 |
| 239 | ASRELERYSINPGLLE  | HIV-1 | 2 | 0,006 |
| 240 | ASRELGRFALNSDLLE  | HIV-1 | 2 | 0,006 |
| 241 | ASRELKRFAVNPGLLE  | HIV-1 | 2 | 0,006 |
| 242 | ASRELSRFALNPDLLLE | HIV-1 | 2 | 0,006 |

|     |                   |        |   |       |
|-----|-------------------|--------|---|-------|
| 243 | ASRELSRFALNPGLLE  | HIV-1  | 2 | 0,006 |
| 244 | ASREMEKFALNPGLLE  | HIV-1  | 2 | 0,006 |
| 245 | ASREMERFALNPDLLLE | HIV-1  | 2 | 0,006 |
| 246 | ASREPERFAVNPGLLE  | HIV-1  | 2 | 0,006 |
| 247 | ASREQERFALNPGLLE  | HIV-1  | 2 | 0,006 |
| 248 | ASREVERFALDPGLLE  | HIV-1  | 2 | 0,006 |
| 249 | ASRGLDRFALNPSLLE  | HIV-1  | 2 | 0,006 |
| 250 | ASRKLERFAVNPGLLE  | HIV-1  | 2 | 0,006 |
| 251 | ASRKLERFAVNPGLLK  | HIV-1  | 2 | 0,006 |
| 252 | AVNELDRFGLAESLLE  | HIV-2  | 2 | 0,006 |
| 253 | AVNELDRFGLAETLLE  | HIV-2  | 2 | 0,006 |
| 254 | PSRELEQFAVNSGLLK  | HIV-1  | 2 | 0,006 |
| 255 | PSRELERFALNPGLLE  | HIV-1  | 2 | 0,006 |
| 256 | SSRELERFAVNPGLLE  | HIV-1  | 2 | 0,006 |
| 257 | TSRELERFAINPGLLE  | HIV-1  | 2 | 0,006 |
| 258 | VSRELERFAVNHGLLE  | HIV-1  | 2 | 0,006 |
| 259 | AAKELDRFGLAESLLE  | SIVsmm | 1 | 0,003 |
| 260 | AAKELDRFGLSDSLLE  | SIVden | 1 | 0,003 |
| 261 | AANELDGFGLAESLLR  | SIVsmm | 1 | 0,003 |
| 262 | AANELDKFGLAESLLD  | SIVsmm | 1 | 0,003 |
| 263 | AANELDKFGLTESLLE  | HIV-2  | 1 | 0,003 |
| 264 | AANELDRFGFAESLLE  | SIVsmm | 1 | 0,003 |
| 265 | AANELDRFGLADNLLLE | SIVsmm | 1 | 0,003 |
| 266 | AANELDRFGLADSLLG  | SIVsmm | 1 | 0,003 |
| 267 | AANELDRFGLAEGLLE  | SIVsmm | 1 | 0,003 |
| 268 | AANELDRFGLAESLVE  | SIVsmm | 1 | 0,003 |
| 269 | AANELDRFGLAETLLE  | SIVsmm | 1 | 0,003 |
| 270 | AANELDRFRLAENLLE  | HIV-2  | 1 | 0,003 |
| 271 | AANELDRFRLAERLLE  | SIVsmm | 1 | 0,003 |

|     |                   |        |   |       |
|-----|-------------------|--------|---|-------|
| 272 | AANELERFGLAENLLR  | SIVsmm | 1 | 0,003 |
| 273 | AANELGKFGLAESLLE  | HIV-2  | 1 | 0,003 |
| 274 | AANELNRFGLSESPVE  | HIV-2  | 1 | 0,003 |
| 275 | AANGLDRFGLAESLLD  | SIVsmm | 1 | 0,003 |
| 276 | AANGLDRFGLAESLLE  | SIVsmm | 1 | 0,003 |
| 277 | AANGLDRFGLPGKLLG  | SIVsmm | 1 | 0,003 |
| 278 | AANRIGRFGLAESLLE  | SIVsmm | 1 | 0,003 |
| 279 | AARELDRFGLSEALLE  | SIVdeb | 1 | 0,003 |
| 280 | AARELDRFGSAESLLE  | SIVsmm | 1 | 0,003 |
| 281 | AASELDRFGLAESLLA  | SIVsmm | 1 | 0,003 |
| 282 | ACRELEQFAVNPGLLE  | HIV-1  | 1 | 0,003 |
| 283 | ACRELERFGLSDTLLD  | SIVagi | 1 | 0,003 |
| 284 | AENELDRFGLAESLLE  | SIVsmm | 1 | 0,003 |
| 285 | AGKELDRFGLAAALLE  | SIVdeb | 1 | 0,003 |
| 286 | AGKELDRFGLNKELLR  | SIVsol | 1 | 0,003 |
| 287 | AGKELDRFGLSADLLR  | SIVsol | 1 | 0,003 |
| 288 | AGKELDRFGLSANLLE  | SIVtan | 1 | 0,003 |
| 289 | AGKELDRFGLSDQLLE  | SIVsyk | 1 | 0,003 |
| 290 | AGKELERFALNPGLLE  | HIV-1  | 1 | 0,003 |
| 291 | AGKEMERFGLHQKLLLE | SIVagm | 1 | 0,003 |
| 292 | AGKKMDRFGLHEKLLLE | SIVgrv | 1 | 0,003 |
| 293 | AGKKMERFGLHEKLLLE | SIVtan | 1 | 0,003 |
| 294 | AGNELQRFALNPGLME  | SIVcpz | 1 | 0,003 |
| 295 | AGNQLERFALNPGLME  | SIVcpz | 1 | 0,003 |
| 296 | AGRELDRFALDPGLLE  | HIV-1  | 1 | 0,003 |
| 297 | AGRELDRFALNPSLLE  | HIV-1  | 1 | 0,003 |
| 298 | AGRELDRFAMDPGLLE  | HIV-1  | 1 | 0,003 |
| 299 | AGRELERFALDPGLLE  | HIV-1  | 1 | 0,003 |
| 300 | AGRELERFALDSGLLE  | HIV-1  | 1 | 0,003 |

|     |                  |        |   |       |
|-----|------------------|--------|---|-------|
| 301 | AGRELERFAVNAGLLE | HIV-1  | 1 | 0,003 |
| 302 | AGRELERFAVNSGLLE | HIV-1  | 1 | 0,003 |
| 303 | AGRELGRFAINPGLLE | HIV-1  | 1 | 0,003 |
| 304 | AGREMERFGLHERLLE | SIVagm | 1 | 0,003 |
| 305 | AGSELERFAMNPGLME | SIVcpz | 1 | 0,003 |
| 306 | AKKELDRFGLSDQLLE | SIVblu | 1 | 0,003 |
| 307 | AKKELDRFGLSDQLME | SIVsyk | 1 | 0,003 |
| 308 | ANRELDKFAFNRGVFG | HIV-1  | 1 | 0,003 |
| 309 | ANRELEKFALNPDLLD | HIV-1  | 1 | 0,003 |
| 310 | ANRELERFAINPGLLE | HIV-1  | 1 | 0,003 |
| 311 | ANRELERFAVNPGLLE | HIV-1  | 1 | 0,003 |
| 312 | APNELDRFGLAESLLE | SIVsmm | 1 | 0,003 |
| 313 | ARRELEKSALNPSLLE | HIV-1  | 1 | 0,003 |
| 314 | ARSELQRFALSSSLLE | SIVcpz | 1 | 0,003 |
| 315 | ASGEGERFALNPTLLK | HIV-1  | 1 | 0,003 |
| 316 | ASGELEKFSLNPGLLE | HIV-1  | 1 | 0,003 |
| 317 | ASGELERFAINPGLLE | HIV-1  | 1 | 0,003 |
| 318 | ASGELERFAINPSFLE | HIV-1  | 1 | 0,003 |
| 319 | ASGELERFALNPSLLE | HIV-1  | 1 | 0,003 |
| 320 | ASGELERFALNSGLLE | HIV-1  | 1 | 0,003 |
| 321 | ASGELERFAPNPGLLE | HIV-1  | 1 | 0,003 |
| 322 | ASGELGRFALNPSLLE | HIV-1  | 1 | 0,003 |
| 323 | ASKELDRFALNPGLLE | HIV-1  | 1 | 0,003 |
| 324 | ASKELDRFALNPSLLE | HIV-1  | 1 | 0,003 |
| 325 | ASKELDRFGLSANLLE | SIVsab | 1 | 0,003 |
| 326 | ASKELDRFGLSDALLE | SIVmus | 1 | 0,003 |
| 327 | ASKELDRFGLSDSLLE | SIVmus | 1 | 0,003 |
| 328 | ASKELDRFSLSANLLE | SIVsab | 1 | 0,003 |
| 329 | ASKELDRYAVNPGLLE | HIV-1  | 1 | 0,003 |

|     |                   |        |   |       |
|-----|-------------------|--------|---|-------|
| 330 | ASKELEHFALNPGLLE  | HIV-1  | 1 | 0,003 |
| 331 | ASKELERFAIDPGLLE  | HIV-1  | 1 | 0,003 |
| 332 | ASKELERFAINPGPLE  | HIV-1  | 1 | 0,003 |
| 333 | ASKELERFALDPSLLE  | HIV-1  | 1 | 0,003 |
| 334 | ASKELERFALNPDLLLE | HIV-1  | 1 | 0,003 |
| 335 | ASKELERFAVNPGLLG  | HIV-1  | 1 | 0,003 |
| 336 | ASKELERFAVNSRLLE  | HIV-1  | 1 | 0,003 |
| 337 | ASKELERFGLADSLLE  | SIVasc | 1 | 0,003 |
| 338 | ASKELERLALNPGLLE  | HIV-1  | 1 | 0,003 |
| 339 | ASKELERLAVNPGLLE  | HIV-1  | 1 | 0,003 |
| 340 | ASKELERYALSDALLE  | SIVgsn | 1 | 0,003 |
| 341 | ASKELERYALSGSLLE  | SIVgsn | 1 | 0,003 |
| 342 | ASKEVERFTLNPGGLFE | HIV-1  | 1 | 0,003 |
| 343 | ASMELERFALNPGLLE  | HIV-1  | 1 | 0,003 |
| 344 | ASMELERFAVNPGLLE  | HIV-1  | 1 | 0,003 |
| 345 | ASQELEKFKVNPGLLG  | HIV-1  | 1 | 0,003 |
| 346 | ASQELERFALNPSLLE  | HIV-1  | 1 | 0,003 |
| 347 | ASQELERFAVNPGLLE  | HIV-1  | 1 | 0,003 |
| 348 | ASQELERLALNPGLLE  | HIV-1  | 1 | 0,003 |
| 349 | ASQELSRFALNPSLLE  | HIV-1  | 1 | 0,003 |
| 350 | ASRALERFAVNPGLLE  | HIV-1  | 1 | 0,003 |
| 351 | ASRAVEQLAVNPGLLE  | HIV-1  | 1 | 0,003 |
| 352 | ASREAERFALNPGLLE  | HIV-1  | 1 | 0,003 |
| 353 | ASREAERYALNPGLLE  | HIV-1  | 1 | 0,003 |
| 354 | ASRECERFAVNPGLLE  | HIV-1  | 1 | 0,003 |
| 355 | ASREEERFAINPGLLE  | HIV-1  | 1 | 0,003 |
| 356 | ASREFERFALNPGLLE  | HIV-1  | 1 | 0,003 |
| 357 | ASREFERFAVNPGLLE  | HIV-1  | 1 | 0,003 |
| 358 | ASREGDRLAVNPSLLE  | HIV-1  | 1 | 0,003 |

|     |                   |        |   |       |
|-----|-------------------|--------|---|-------|
| 359 | ASREIERFALNPGLLE  | HIV-1  | 1 | 0,003 |
| 360 | ASREIERFAVNPGLLE  | HIV-1  | 1 | 0,003 |
| 361 | ASREIERFAVYPGLFE  | HIV-1  | 1 | 0,003 |
| 362 | ASREIERFSINPGLLE  | HIV-1  | 1 | 0,003 |
| 363 | ASRELARFALNPDLLLE | HIV-1  | 1 | 0,003 |
| 364 | ASRELDKFAINPGLLE  | HIV-1  | 1 | 0,003 |
| 365 | ASRELDKFSINPGLLE  | HIV-1  | 1 | 0,003 |
| 366 | ASRELDKFSLHPGFLE  | HIV-1  | 1 | 0,003 |
| 367 | ASRELDRFACNPGLMD  | HIV-1  | 1 | 0,003 |
| 368 | ASRELDRFAINPGLIE  | HIV-1  | 1 | 0,003 |
| 369 | ASRELDRFALDSSLLE  | HIV-1  | 1 | 0,003 |
| 370 | ASRELDRFALNAGLLE  | HIV-1  | 1 | 0,003 |
| 371 | ASRELDRFALNPDLLG  | HIV-1  | 1 | 0,003 |
| 372 | ASRELDRFALNPGLIE  | HIV-1  | 1 | 0,003 |
| 373 | ASRELDRFALNPSLLD  | HIV-1  | 1 | 0,003 |
| 374 | ASRELDRFALNPSLLG  | HIV-1  | 1 | 0,003 |
| 375 | ASRELDRFALNRGILE  | HIV-1  | 1 | 0,003 |
| 376 | ASRELDRFALNSSLLE  | HIV-1  | 1 | 0,003 |
| 377 | ASRELDRFATNPGLLE  | HIV-1  | 1 | 0,003 |
| 378 | ASRELDRFVNPGLLG   | HIV-1  | 1 | 0,003 |
| 379 | ASRELDRFAYNPELLE  | HIV-1  | 1 | 0,003 |
| 380 | ASRELDRFGLAGALLE  | SIVdeb | 1 | 0,003 |
| 381 | ASRELDRFGLSDSLLE  | SIVmus | 1 | 0,003 |
| 382 | ASRELDRFNLNPSLLE  | HIV-1  | 1 | 0,003 |
| 383 | ASRELDRYACNPELLE  | HIV-1  | 1 | 0,003 |
| 384 | ASRELDRYALNPGLLD  | HIV-1  | 1 | 0,003 |
| 385 | ASRELEAFALNLGLLA  | HIV-1  | 1 | 0,003 |
| 386 | ASRELEGFALDPSLLE  | HIV-1  | 1 | 0,003 |
| 387 | ASRELEGFAVNPSLLE  | HIV-1  | 1 | 0,003 |

|     |                     |       |   |       |
|-----|---------------------|-------|---|-------|
| 388 | ASRELEHFSINPGLLE    | HIV-1 | 1 | 0,003 |
| 389 | ASRELEIFALNPSLLE    | HIV-1 | 1 | 0,003 |
| 390 | ASRELEKFAFNPSLLE    | HIV-1 | 1 | 0,003 |
| 391 | ASRELEKFAINPDLLLE   | HIV-1 | 1 | 0,003 |
| 392 | ASRELEKFAINPGLIE    | HIV-1 | 1 | 0,003 |
| 393 | ASRELEKFA LDPSLLE   | HIV-1 | 1 | 0,003 |
| 394 | ASRELEKFA LNPCLLLE  | HIV-1 | 1 | 0,003 |
| 395 | ASRELEKFA LNPDPLE   | HIV-1 | 1 | 0,003 |
| 396 | ASRELEKFA LN PGLME  | HIV-1 | 1 | 0,003 |
| 397 | ASRELEKFA LN PGLSE  | HIV-1 | 1 | 0,003 |
| 398 | ASRELEKFA LN SDDLLE | HIV-1 | 1 | 0,003 |
| 399 | ASRELEKFA LS PDLLLE | HIV-1 | 1 | 0,003 |
| 400 | ASRELEKFA LT PGLLE  | HIV-1 | 1 | 0,003 |
| 401 | ASRELEKFSINPDLLLE   | HIV-1 | 1 | 0,003 |
| 402 | ASRELEKFSPNPGLLE    | HIV-1 | 1 | 0,003 |
| 403 | ASRELEKFTLN PGLLE   | HIV-1 | 1 | 0,003 |
| 404 | ASRELEKFVLN PGLLE   | HIV-1 | 1 | 0,003 |
| 405 | ASRELEKSALNPGVLE    | HIV-1 | 1 | 0,003 |
| 406 | ASRELEKSALNPSLLE    | HIV-1 | 1 | 0,003 |
| 407 | ASRELEKYSLNPDLLLE   | HIV-1 | 1 | 0,003 |
| 408 | ASRELENFACDPGLLE    | HIV-1 | 1 | 0,003 |
| 409 | ASRELENFALNPDLLLE   | HIV-1 | 1 | 0,003 |
| 410 | ASRELENFSLN PGLLE   | HIV-1 | 1 | 0,003 |
| 411 | ASRELENYACDPELLD    | HIV-1 | 1 | 0,003 |
| 412 | ASRELEQFAINPGLIE    | HIV-1 | 1 | 0,003 |
| 413 | ASRELEQFALNPSLLE    | HIV-1 | 1 | 0,003 |
| 414 | ASRELEQFSINPGLLE    | HIV-1 | 1 | 0,003 |
| 415 | ASRELEQYAINPGLLE    | HIV-1 | 1 | 0,003 |
| 416 | ASRELERCAINPGLLE    | HIV-1 | 1 | 0,003 |



|     |                   |        |   |       |
|-----|-------------------|--------|---|-------|
| 417 | ASRELERFACDPELLE  | HIV-1  | 1 | 0,003 |
| 418 | ASRELERFACNPSLLE  | HIV-1  | 1 | 0,003 |
| 419 | ASRELERFACNPSLME  | SIVcpz | 1 | 0,003 |
| 420 | ASRELERFAFNPGLE   | HIV-1  | 1 | 0,003 |
| 421 | ASRELERFAGNPGLLE  | HIV-1  | 1 | 0,003 |
| 422 | ASRELERFAIDPGLLD  | HIV-1  | 1 | 0,003 |
| 423 | ASRELERFAINHGLLE  | HIV-1  | 1 | 0,003 |
| 424 | ASRELERFAINPGLIE  | HIV-1  | 1 | 0,003 |
| 425 | ASRELERFAINPGLLD  | HIV-1  | 1 | 0,003 |
| 426 | ASRELERFAINPGLLG  | HIV-1  | 1 | 0,003 |
| 427 | ASRELERFAINPGLLQ  | HIV-1  | 1 | 0,003 |
| 428 | ASRELERFAINPGLME  | HIV-1  | 1 | 0,003 |
| 429 | ASRELERFALAPGLLE  | HIV-1  | 1 | 0,003 |
| 430 | ASRELERFALDPGFLE  | HIV-1  | 1 | 0,003 |
| 431 | ASRELERFALDPGLLD  | HIV-1  | 1 | 0,003 |
| 432 | ASRELERFALDPGPLE  | HIV-1  | 1 | 0,003 |
| 433 | ASRELERFALDPSPLE  | HIV-1  | 1 | 0,003 |
| 434 | ASRELERFALKPSLLE  | HIV-1  | 1 | 0,003 |
| 435 | ASRELERFALLSGLLE  | HIV-1  | 1 | 0,003 |
| 436 | ASRELERFALNANLLE  | HIV-1  | 1 | 0,003 |
| 437 | ASRELERFALNHDLLE  | HIV-1  | 1 | 0,003 |
| 438 | ASRELERFALNHGLLE  | HIV-1  | 1 | 0,003 |
| 439 | ASRELERFALNLGLLE  | HIV-1  | 1 | 0,003 |
| 440 | ASRELERFALNLSLLE  | HIV-1  | 1 | 0,003 |
| 441 | ASRELERFALNPDILE  | HIV-1  | 1 | 0,003 |
| 442 | ASRELERFALNPDILIE | HIV-1  | 1 | 0,003 |
| 443 | ASRELERFALNPDLLD  | HIV-1  | 1 | 0,003 |
| 444 | ASRELERFALNPDLLG  | HIV-1  | 1 | 0,003 |
| 445 | ASRELERFALNPDLMIE | HIV-1  | 1 | 0,003 |

|     |                   |       |   |       |
|-----|-------------------|-------|---|-------|
| 446 | ASRELERFALNPDLVE  | HIV-1 | 1 | 0,003 |
| 447 | ASRELERFALNPGCLE  | HIV-1 | 1 | 0,003 |
| 448 | ASRELERFALNPGFLD  | HIV-1 | 1 | 0,003 |
| 449 | ASRELERFALNPGILE  | HIV-1 | 1 | 0,003 |
| 450 | ASRELERFALNPGRLE  | HIV-1 | 1 | 0,003 |
| 451 | ASRELERFALNPILLE  | HIV-1 | 1 | 0,003 |
| 452 | ASRELERFALNPRVFFV | HIV-1 | 1 | 0,003 |
| 453 | ASRELERFALNPSLFE  | HIV-1 | 1 | 0,003 |
| 454 | ASRELERFALNPSLIE  | HIV-1 | 1 | 0,003 |
| 455 | ASRELERFALNPSLLK  | HIV-1 | 1 | 0,003 |
| 456 | ASRELERFALNPTLLE  | HIV-1 | 1 | 0,003 |
| 457 | ASRELERFALNPVFLE  | HIV-1 | 1 | 0,003 |
| 458 | ASRELERFALNRGLLE  | HIV-1 | 1 | 0,003 |
| 459 | ASRELERFALNRSLLE  | HIV-1 | 1 | 0,003 |
| 460 | ASRELERFALNSDLIE  | HIV-1 | 1 | 0,003 |
| 461 | ASRELERFALNSELLE  | HIV-1 | 1 | 0,003 |
| 462 | ASRELERFALSPSLLE  | HIV-1 | 1 | 0,003 |
| 463 | ASRELERFALTPGLLE  | HIV-1 | 1 | 0,003 |
| 464 | ASRELERFALTPSLLE  | HIV-1 | 1 | 0,003 |
| 465 | ASRELERFALYHGLLE  | HIV-1 | 1 | 0,003 |
| 466 | ASRELERFALYPGLLE  | HIV-1 | 1 | 0,003 |
| 467 | ASRELERFAMNPGLLE  | HIV-1 | 1 | 0,003 |
| 468 | ASRELERFASNPGLE   | HIV-1 | 1 | 0,003 |
| 469 | ASRELERFAVDPALLE  | HIV-1 | 1 | 0,003 |
| 470 | ASRELERFAVDPSLLE  | HIV-1 | 1 | 0,003 |
| 471 | ASRELERFAVIPGLLE  | HIV-1 | 1 | 0,003 |
| 472 | ASRELERFAVISGLLE  | HIV-1 | 1 | 0,003 |
| 473 | ASRELERFAVKPGLLE  | HIV-1 | 1 | 0,003 |
| 474 | ASRELERFAVNLGLLE  | HIV-1 | 1 | 0,003 |

|     |                  |        |   |       |
|-----|------------------|--------|---|-------|
| 475 | ASRELERFAVNLVLLE | HIV-1  | 1 | 0,003 |
| 476 | ASRELERFAVNPALME | HIV-1  | 1 | 0,003 |
| 477 | ASRELERFAVNPCLLK | HIV-1  | 1 | 0,003 |
| 478 | ASRELERFAVNPGLLA | HIV-1  | 1 | 0,003 |
| 479 | ASRELERFAVNPGLLQ | HIV-1  | 1 | 0,003 |
| 480 | ASRELERFAVNPGQLE | HIV-1  | 1 | 0,003 |
| 481 | ASRELERFAVNPGRLE | HIV-1  | 1 | 0,003 |
| 482 | ASRELERFAVNPSLIE | HIV-1  | 1 | 0,003 |
| 483 | ASRELERFAVNPSLLD | HIV-1  | 1 | 0,003 |
| 484 | ASRELERFAVNPSLMK | HIV-1  | 1 | 0,003 |
| 485 | ASRELERFAVNRGLLE | HIV-1  | 1 | 0,003 |
| 486 | ASRELERFEINPDLE  | HIV-1  | 1 | 0,003 |
| 487 | ASRELERFEINPNLLE | HIV-1  | 1 | 0,003 |
| 488 | ASRELERFELNPGLLE | HIV-1  | 1 | 0,003 |
| 489 | ASRELERFGLNPGLLE | HIV-1  | 1 | 0,003 |
| 490 | ASRELERFGLSDTLLD | SIVrcm | 1 | 0,003 |
| 491 | ASRELERFGLSDTLLE | SIVmus | 1 | 0,003 |
| 492 | ASRELERFIINPSLLE | HIV-1  | 1 | 0,003 |
| 493 | ASRELERFILNPDLLE | HIV-1  | 1 | 0,003 |
| 494 | ASRELERFMLNPGLLE | HIV-1  | 1 | 0,003 |
| 495 | ASRELERFPLNPGLLD | HIV-1  | 1 | 0,003 |
| 496 | ASRELERFPVNPGLLE | HIV-1  | 1 | 0,003 |
| 497 | ASRELERFPVNPGLLK | HIV-1  | 1 | 0,003 |
| 498 | ASRELERFSINPDLE  | HIV-1  | 1 | 0,003 |
| 499 | ASRELERFTINPGLLE | HIV-1  | 1 | 0,003 |
| 500 | ASRELERFTVDPGLLE | HIV-1  | 1 | 0,003 |
| 501 | ASRELERIALNPGLLE | HIV-1  | 1 | 0,003 |
| 502 | ASRELERLALNPGLLE | HIV-1  | 1 | 0,003 |
| 503 | ASRELERLAVNSGLLE | HIV-1  | 1 | 0,003 |

|     |                    |       |   |       |
|-----|--------------------|-------|---|-------|
| 504 | ASRELERLSINPSLLE   | HIV-1 | 1 | 0,003 |
| 505 | ASRELERYACNPGLLE   | HIV-1 | 1 | 0,003 |
| 506 | ASRELERYAIDPGLLE   | HIV-1 | 1 | 0,003 |
| 507 | ASRELERYALNSDLLE   | HIV-1 | 1 | 0,003 |
| 508 | ASRELESFALNPGLLE   | HIV-1 | 1 | 0,003 |
| 509 | ASRELESFALNPSLLE   | HIV-1 | 1 | 0,003 |
| 510 | ASRELETFSLNPGLLE   | HIV-1 | 1 | 0,003 |
| 511 | ASRELGKFALNPDLLLE  | HIV-1 | 1 | 0,003 |
| 512 | ASRELGRFALDPGLLE   | HIV-1 | 1 | 0,003 |
| 513 | ASRELGRFALNASLLE   | HIV-1 | 1 | 0,003 |
| 514 | ASRELGRFALNPDLLLE  | HIV-1 | 1 | 0,003 |
| 515 | ASRELGRFALNPNLLE   | HIV-1 | 1 | 0,003 |
| 516 | ASRELGRFALNRDLLE   | HIV-1 | 1 | 0,003 |
| 517 | ASRELGRFAVDPGLLE   | HIV-1 | 1 | 0,003 |
| 518 | ASRELGRFSLNSGLLE   | HIV-1 | 1 | 0,003 |
| 519 | ASRELKEFALNPGLLE   | HIV-1 | 1 | 0,003 |
| 520 | ASRELKRFAINPVILLE  | HIV-1 | 1 | 0,003 |
| 521 | ASRELKRFALNPSLLE   | HIV-1 | 1 | 0,003 |
| 522 | ASRELNRFALDPSLLE   | HIV-1 | 1 | 0,003 |
| 523 | ASRELNRFALNPDLLLE  | HIV-1 | 1 | 0,003 |
| 524 | ASRELNRFALNPGLLE   | HIV-1 | 1 | 0,003 |
| 525 | ASRELNRFALNPSLLG   | HIV-1 | 1 | 0,003 |
| 526 | ASRELQRFALNPGLLE   | HIV-1 | 1 | 0,003 |
| 527 | ASRELVKSALNHAVLE   | HIV-1 | 1 | 0,003 |
| 528 | ASRELVRFALNLVASK   | HIV-1 | 1 | 0,003 |
| 529 | ASRELVRFALNPSLLE   | HIV-1 | 1 | 0,003 |
| 530 | ASRELVRFVNPGLLE    | HIV-1 | 1 | 0,003 |
| 531 | ASRELVRF SINPDLLLE | HIV-1 | 1 | 0,003 |
| 532 | ASRELYRFALNLGVSA   | HIV-1 | 1 | 0,003 |

|     |                   |       |   |       |
|-----|-------------------|-------|---|-------|
| 533 | ASREMDRFALNPDLLLE | HIV-1 | 1 | 0,003 |
| 534 | ASREMDRFALNPGLLE  | HIV-1 | 1 | 0,003 |
| 535 | ASREMDRFALNPSLLE  | HIV-1 | 1 | 0,003 |
| 536 | ASREMEKFALNSGLLE  | HIV-1 | 1 | 0,003 |
| 537 | ASREMERFALDPGLLE  | HIV-1 | 1 | 0,003 |
| 538 | ASREMERFALNPGLME  | HIV-1 | 1 | 0,003 |
| 539 | ASREMERFALNPSLLV  | HIV-1 | 1 | 0,003 |
| 540 | ASREMERFAVNPGLLE  | HIV-1 | 1 | 0,003 |
| 541 | ASREMERSALNPSLLE  | HIV-1 | 1 | 0,003 |
| 542 | ASREMERYALNPGLLE  | HIV-1 | 1 | 0,003 |
| 543 | ASREPDRFALIPGVLE  | HIV-1 | 1 | 0,003 |
| 544 | ASREPDRFALNPSLLE  | HIV-1 | 1 | 0,003 |
| 545 | ASREPERFALDPGLLE  | HIV-1 | 1 | 0,003 |
| 546 | ASREPERFAVNPDLLE  | HIV-1 | 1 | 0,003 |
| 547 | ASREQERFALNPNLLE  | HIV-1 | 1 | 0,003 |
| 548 | ASRERERFAVNPALVE  | HIV-1 | 1 | 0,003 |
| 549 | ASRERGRFALNPGLLE  | HIV-1 | 1 | 0,003 |
| 550 | ASRESERFALNPGLLE  | HIV-1 | 1 | 0,003 |
| 551 | ASRETERFALNPGLLE  | HIV-1 | 1 | 0,003 |
| 552 | ASREVDRFALNPGLLE  | HIV-1 | 1 | 0,003 |
| 553 | ASREVEKFALNPGLLE  | HIV-1 | 1 | 0,003 |
| 554 | ASREVERFAINPDLLLE | HIV-1 | 1 | 0,003 |
| 555 | ASREVERFLINPGLLE  | HIV-1 | 1 | 0,003 |
| 556 | ASREWERFAVNPGVLE  | HIV-1 | 1 | 0,003 |
| 557 | ASRGLERFAVNPGLLG  | HIV-1 | 1 | 0,003 |
| 558 | ASRKLEKFALNPGLLK  | HIV-1 | 1 | 0,003 |
| 559 | ASRKLERFALNPDLLLE | HIV-1 | 1 | 0,003 |
| 560 | ASRKLERFALNPSLLE  | HIV-1 | 1 | 0,003 |
| 561 | ASRKLERFALNSGLLE  | HIV-1 | 1 | 0,003 |

|     |                   |                    |   |       |
|-----|-------------------|--------------------|---|-------|
| 562 | ASRQLKRFALNSGLLE  | HIV-1              | 1 | 0,003 |
| 563 | ASRRLERFAVNPGLLE  | HIV-1              | 1 | 0,003 |
| 564 | ASRVLERFALNPSLLE  | HIV-1              | 1 | 0,003 |
| 565 | ASSELERFAVNHGLLE  | HIV-1              | 1 | 0,003 |
| 566 | ASSELERFAVNPGLLE  | HIV-1              | 1 | 0,003 |
| 567 | ATKELDRFGLAESLLE  | SIV <sub>smm</sub> | 1 | 0,003 |
| 568 | ATKELDRFGLGAHLLE  | SIV <sub>lst</sub> | 1 | 0,003 |
| 569 | ATKELDRFGLGANLLE  | SIV <sub>lst</sub> | 1 | 0,003 |
| 570 | ATKELDRFGLGSQLE   | SIV <sub>lst</sub> | 1 | 0,003 |
| 571 | ATRELDREFGLGAHLLE | SIV <sub>lst</sub> | 1 | 0,003 |
| 572 | ATRELEKFALNPGLLK  | HIV-1              | 1 | 0,003 |
| 573 | ATRELERFALNPGLLE  | HIV-1              | 1 | 0,003 |
| 574 | ATRNLENFALTPGLLK  | HIV-1              | 1 | 0,003 |
| 575 | AVNELDRYGLAESLLE  | HIV-2              | 1 | 0,003 |
| 576 | AVNELDRYGLAETLLE  | HIV-2              | 1 | 0,003 |
| 577 | AVNELERFGLAESRLG  | HIV-2              | 1 | 0,003 |
| 578 | CKGELDRFGLSDKLLE  | SIV <sub>md</sub>  | 1 | 0,003 |
| 579 | EANELDRFGLAESLLE  | SIV <sub>smm</sub> | 1 | 0,003 |
| 580 | EAWWTERFAVNPGLLE  | HIV-1              | 1 | 0,003 |
| 581 | ESRELERFAVNPGLLE  | HIV-1              | 1 | 0,003 |
| 582 | FSRELDREFALNPSLLE | HIV-1              | 1 | 0,003 |
| 583 | LTNELDRFGLAESLLE  | SIV <sub>smm</sub> | 1 | 0,003 |
| 584 | LVKELEKLCLDSALIS  | SIV <sub>wrc</sub> | 1 | 0,003 |
| 585 | LVKELEKLCLDSTLIA  | SIV <sub>wrc</sub> | 1 | 0,003 |
| 586 | LVREVERFAVNPGLLE  | HIV-1              | 1 | 0,003 |
| 587 | MCHEVTRLCLNVELLK  | SIV <sub>col</sub> | 1 | 0,003 |
| 588 | MCTEVNRLCLNIELLK  | SIV <sub>col</sub> | 1 | 0,003 |
| 589 | MCTEVSRCVLIFELLK  | SIV <sub>col</sub> | 1 | 0,003 |
| 590 | MCTEVTRLCLNVELLK  | SIV <sub>col</sub> | 1 | 0,003 |

|     |                   |        |   |       |
|-----|-------------------|--------|---|-------|
| 591 | PSRELDLRFVNSGLLE  | HIV-1  | 1 | 0,003 |
| 592 | PSRELEKFALNPSLLE  | HIV-1  | 1 | 0,003 |
| 593 | PSRELEKFPINPGLLE  | HIV-1  | 1 | 0,003 |
| 594 | PSRELEPFALTLGLLA  | HIV-1  | 1 | 0,003 |
| 595 | PSRELERFALNPSLLE  | HIV-1  | 1 | 0,003 |
| 596 | PSRELERFAVNPGLLE  | HIV-1  | 1 | 0,003 |
| 597 | PSRELERFAVNSGLLE  | HIV-1  | 1 | 0,003 |
| 598 | SKKEMERFGLGEQLLE  | SIVmon | 1 | 0,003 |
| 599 | TSRELERFALDPSLLE  | HIV-1  | 1 | 0,003 |
| 600 | TSRELKRFALNPSLLE  | HIV-1  | 1 | 0,003 |
| 601 | VSKELELYAINPGLLE  | HIV-1  | 1 | 0,003 |
| 602 | VSMELGRFSINPGLLE  | HIV-1  | 1 | 0,003 |
| 603 | VSRELDLRFALNPGLLE | HIV-1  | 1 | 0,003 |
| 604 | VSRELERFAINPGLLE  | HIV-1  | 1 | 0,003 |
| 605 | VSRELERFALNPGLLE  | HIV-1  | 1 | 0,003 |
| 606 | VSRELERFAVNPSLLE  | HIV-1  | 1 | 0,003 |
| 607 | VSRELERFPVNPGLLE  | HIV-1  | 1 | 0,003 |
| 608 | VSRVLERFAVNPGLLE  | HIV-1  | 1 | 0,003 |

**Table S2. Descriptive statistical analysis of S1, S2 and S3 sub-fragments.** In the table are shown the results of the descriptive statistical analysis of 37-44 (S1), 45-49 (S2) and 50-52 (S3) of HIV-1 and HIV-2 p17 sub-fragments. The distribution of the three sub-fragments over the 33180 sequences is: S1-HIV-1 sub-fragment is in the majority of the HIV-1 and SIVgor, 55% of SIVcpz, and two OWM SIV sequences; S1-HIV-2 sub-fragment is in the majority of SIVsmm and HIV-2 sequences; S2-HIV-1 is in 80% of HIV-1 and in two SIVcpz sequences; S2-HIV-2 is in the majority of SIVsmm and HIV-2 sequences; S3-HIV-1 and S3-HIV-2 is mostly ubiquitous over the sequences. S2-HIV1 sub-fragment has the A[V/L]NPG pattern sequence (14187 AVNPG and 12335 ALNPG), in which the V/L amino acid variation preserves biochemical properties. Sub-fragments color code: S1 in orange, S2 in red and S3 in grey from the active fragment; S1 in azure, S2 in blue and S3 in grey from the inactive fragment.

|                                                                                     |         | S1              | S2             | S3             |                 |             |           |
|-------------------------------------------------------------------------------------|---------|-----------------|----------------|----------------|-----------------|-------------|-----------|
| Active p17 fragment                                                                 |         | 37-44ASRELERF   | 45-49AVNPG     | 50-52LLE       |                 |             |           |
| Inactive p17 fragment                                                               |         | 37-44AANELDRF   | 45-49GLAES     | 50-52LLE       |                 |             |           |
|                                                                                     |         | Total sequences | 37-44 ASRELERF | 37-44 AANELDRF | 45-49 A[V/L]NPG | 45-49 GLAES | 50-52 LLE |
| 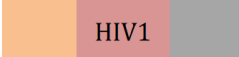 | HIV1    | 32753           | 30079          | //             | 26550           | //          | 32165     |
|                                                                                     | SIVcpz  | 31              | 17             | //             | 2               | //          | 1         |
|                                                                                     | SIVgor  | 9               | 7              | //             | //              | //          | 1         |
|  | HIV2    | 39              | //             | 25             | //              | 30          | 37        |
|                                                                                     | SIVsmm  | 239             | //             | 207            | //              | 218         | 200       |
|                                                                                     | OWM SIV | 109             | 2              | //             | //              | //          | 95        |
